# Supplementary material for: Sensitivity of active-layer freezing process to snow cover in Arctic Alaska
Source: Copernicus journal article supplement (doi:10.5194/tc-13-197-2019), 2019-01-23
Supplement: Supplementary file 1 [file tc-13-197-2019-supplement.pdf]

Supplement of The Cryosphere, 13, 197–218, 2019  
<https://doi.org/10.5194/tc-13-197-2019-supplement>  
© Author(s) 2019. This work is distributed under  
the Creative Commons Attribution 4.0 License.

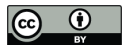

*Supplement of*

## **Sensitivity of active-layer freezing process to snow cover in Arctic Alaska**

**Yonghong Yi et al.**

*Correspondence to:* Yonghong Yi ([yonghong.yi@jpl.nasa.gov](mailto:yonghong.yi@jpl.nasa.gov))

The copyright of individual parts of the supplement might differ from the CC BY 4.0 License.

**Table S1: The characteristics of GTN-P sites used in this study. The soil temperature measurements were available at different depths for each site, ranging from 0.01m to 1m, and may change during the observational period. The data were resampled to similar depths before analysis. The vegetation type at those sites are dominated by tundra.**

| Site name                  | ID      | Location            | Elevation (m) | Temporal period* |
|----------------------------|---------|---------------------|---------------|------------------|
| West Dock (old instrument) | WD1     | 148.552°W, 70.374°N | 3             | 2005-2015        |
| West Dock (New Instrument) | WDN     | 148.552°W, 70.374°N | 3             | 2009-2015        |
| Deadhorse                  | DH      | 148.465°W, 70.161°N | 16            | 2006-2014        |
| Deadhorse 1                | DH1     | 148.466°W, 70.162°N | 16            | 2010-2015        |
| Franklin Bluffs (dry)_b    | FBD     | 148.721°W, 69.674°N | 123           | 2007-2015        |
| Franklin Bluffs (surface)  | FBW     | 148.722°W, 69.655°N | 130           | 2001-2015        |
| Franklin Bluffs (wet)_b    | FB1     | 148.722°W, 69.655°N | 130           | 2007-2015        |
| Sagwon MAT                 | SagMAT  | 148.7°W, 69.428°N   | 278           | 2007-2015        |
| Sagwon MNT                 | SagMNT  | 148.674°W, 69.433°N | 278           | 2005-2015        |
| Happy Valley 1_b           | HV1(b)  | 148.848°W, 69.147°N | 309           | 2009-2015        |
| Happy Valley 1_ib          | HV1(ib) | 148.848°W, 69.147°N | 309           | 2009-2015        |
| Imnaviat 1                 | IM1     | 149.352°W, 68.640°N | 298           | 2007-2015        |
| Galbraith Lake             | GL      | 149.502°W, 68.477°N | 316           | 2005-2015        |

\* missing data may exist during the observational period.

**Table S2: Mean bias and RMSE values (unit: days) of model simulated and in-situ observed zero-curtain period at the two Prudhoe Meadow SoilSCAPE nodes (S5 & S6) from 2016 to 2017. The zero-curtain period was determined using a similar cutoff value, i.e.  $\delta$  [Eq. 11], for both in-situ dielectric constant observations and model simulated unfrozen water content. The statistics were averaged for all soil depths (from 13 cm to 55 cm below soil surface). The SoilSCAPE measurements were resampled to the model soil depth (13cm, 23cm, 33cm, 45 cm and 55cm) before comparison.**

|      | cutoff = 0.1 |      | cutoff = 0.15 |      | cutoff = 0.2 |      |
|------|--------------|------|---------------|------|--------------|------|
|      | Bias         | RMSE | Bias          | RMSE | Bias         | RMSE |
| 2016 | -8.3         | 15.9 | -6.6          | 9.0  | 5.0          | 11.0 |
| 2017 | 12.9         | 15.1 | 10.2          | 11.7 | 26.2         | 27.1 |

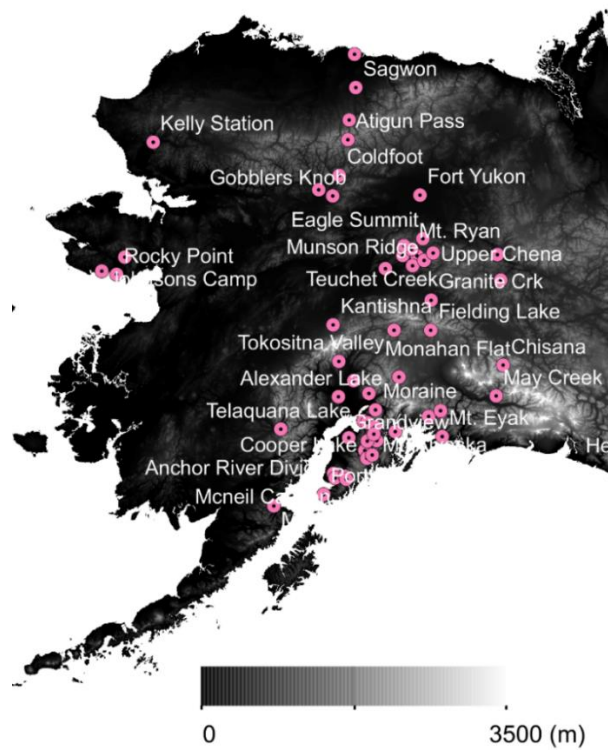

**Figure S1: The location of SNOTEL sites in Alaska.**

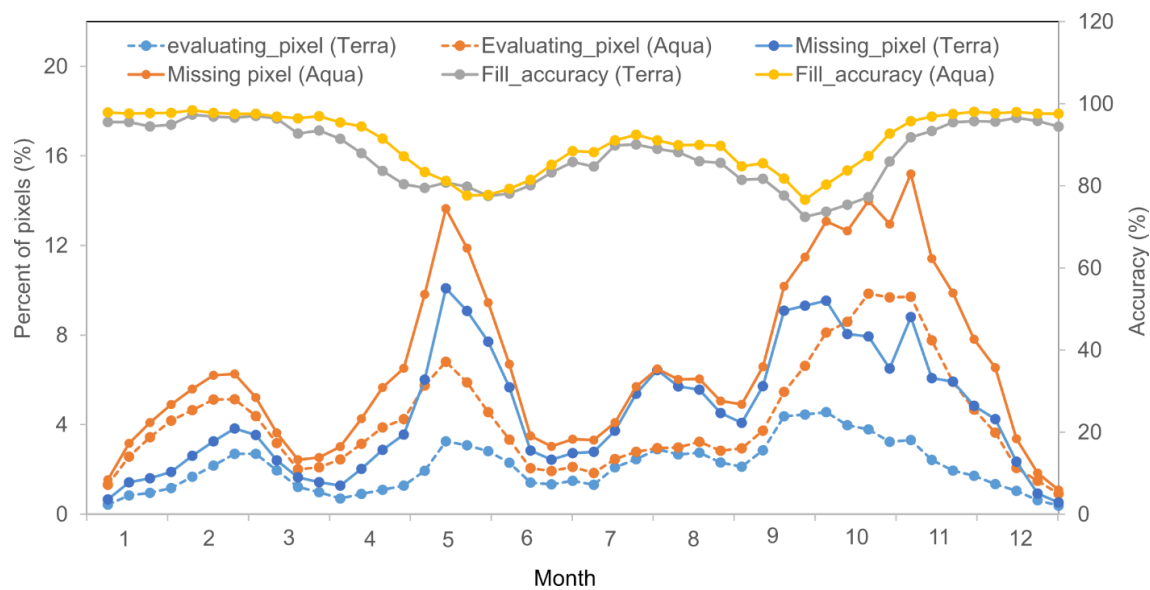

**Figure S2:** The accuracy of the spatial filter algorithm that was used to fill the cloud contaminated pixels in the MODIS SCE data. The percentage of total cloud contaminated pixels was shown as “Missing pixel”. Terra MODIS SCE data were used to evaluate the accuracy of filling pixels in Aqua MODIS SCE data, and vice versa. The percentage of pixels that were cloud covered in Terra (or Aqua) but were clear in Aqua (or Terra) was shown as “evaluating pixel”. Generally, Aqua MODIS shows a greater cloud coverage than Terra MODIS.

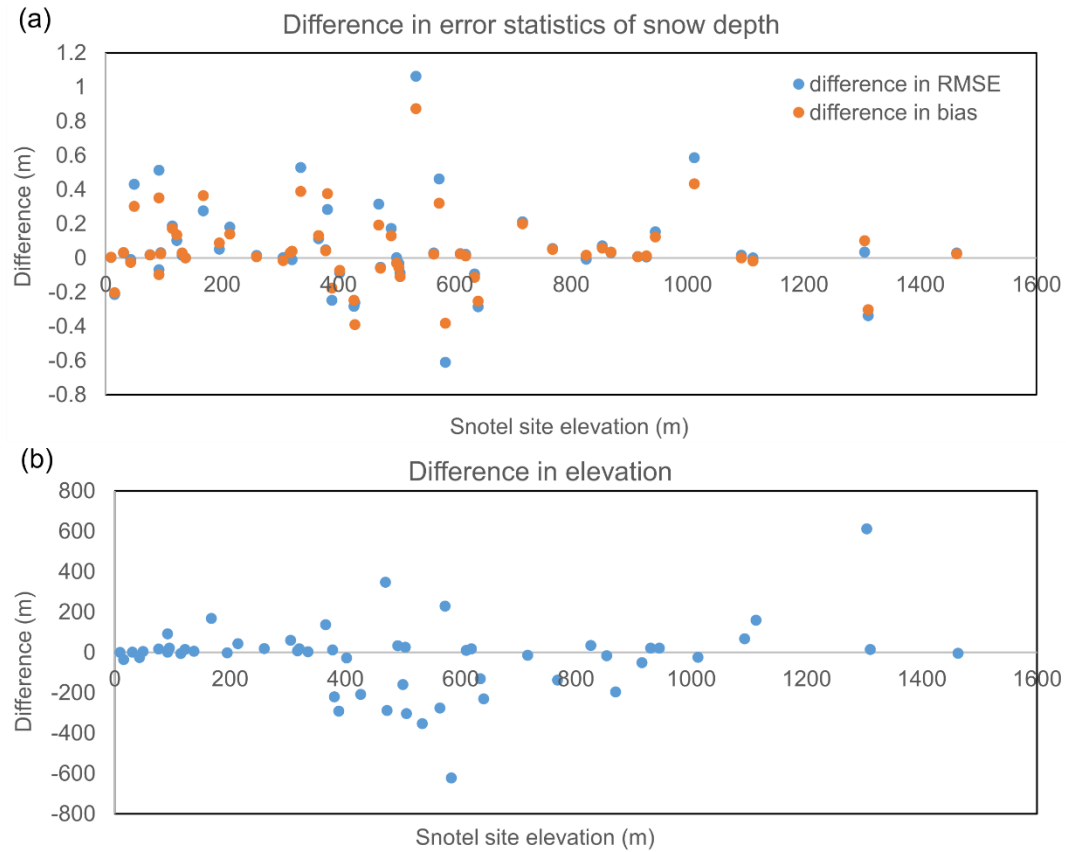

**Figure S3: a) The difference in error statistics of the snow depth data derived from the two studies (Yi et al. 2018 versus this study) against SNOTEL in-situ measurements. A positive difference in RMSE or bias indicates lower errors of the snow depth estimates using the downscaling scheme developed in this study. b) The difference between the in-situ elevation recorded at the SNOTEL sites, and the elevation exacted from the USGS DEM data (used for the downscaling scheme) at the 1-km grid encompassing the site.**

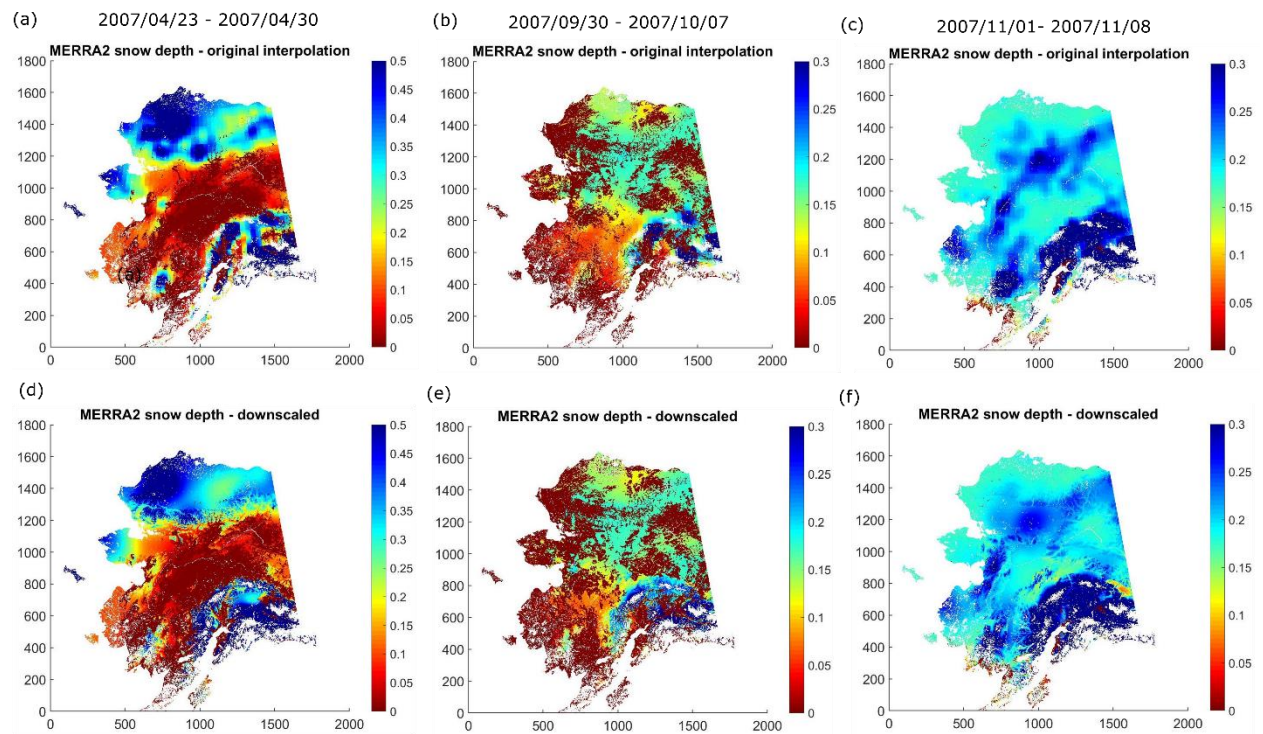

**Figure S4: Comparings of interpolated MERRA-2 snow depth data (1-km) at different seasons using different spatial interpolation schemes: a-c) original spatial interpolation scheme (Yi et al., 2018); d-f) the downscaling scheme developed in this study.**

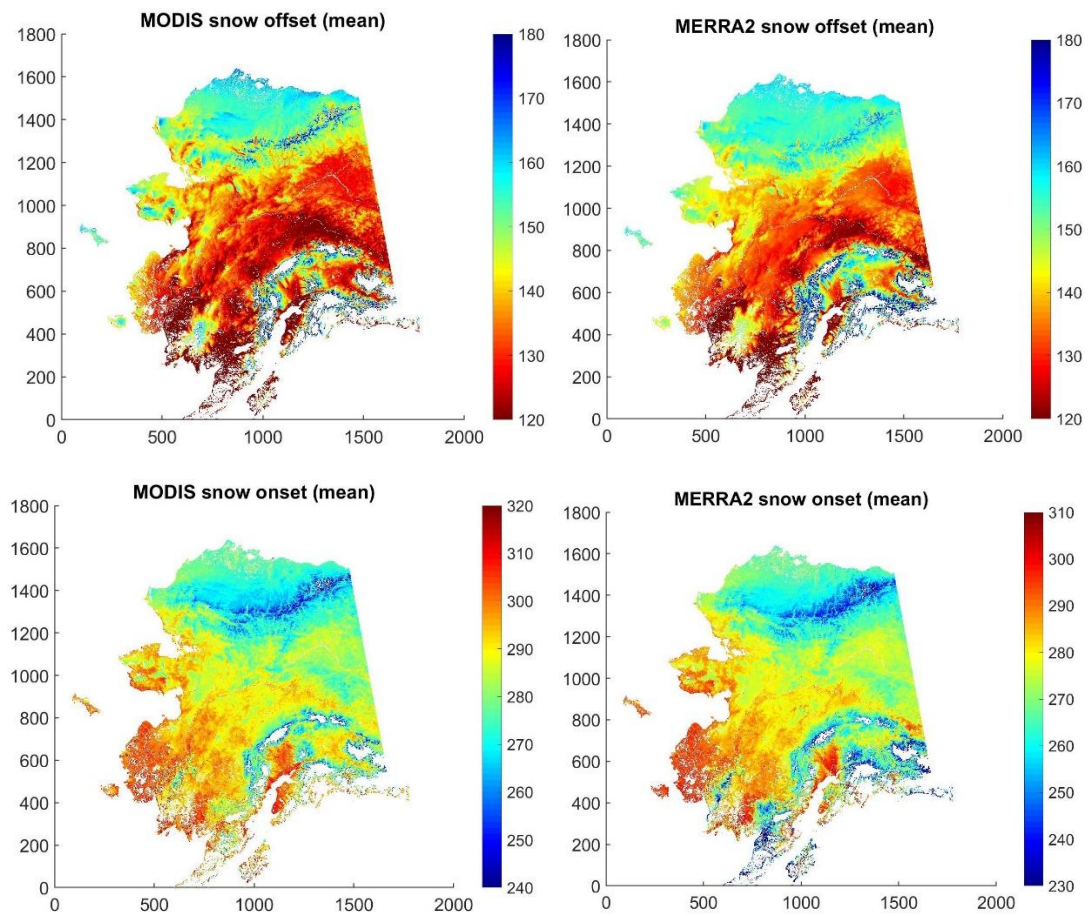

**Figure S5: Comparisons of mean snow offset and onset derived from MODIS SCE data and downscaled MERRA-2 snow depth data averaged from 2001 to 2016.**



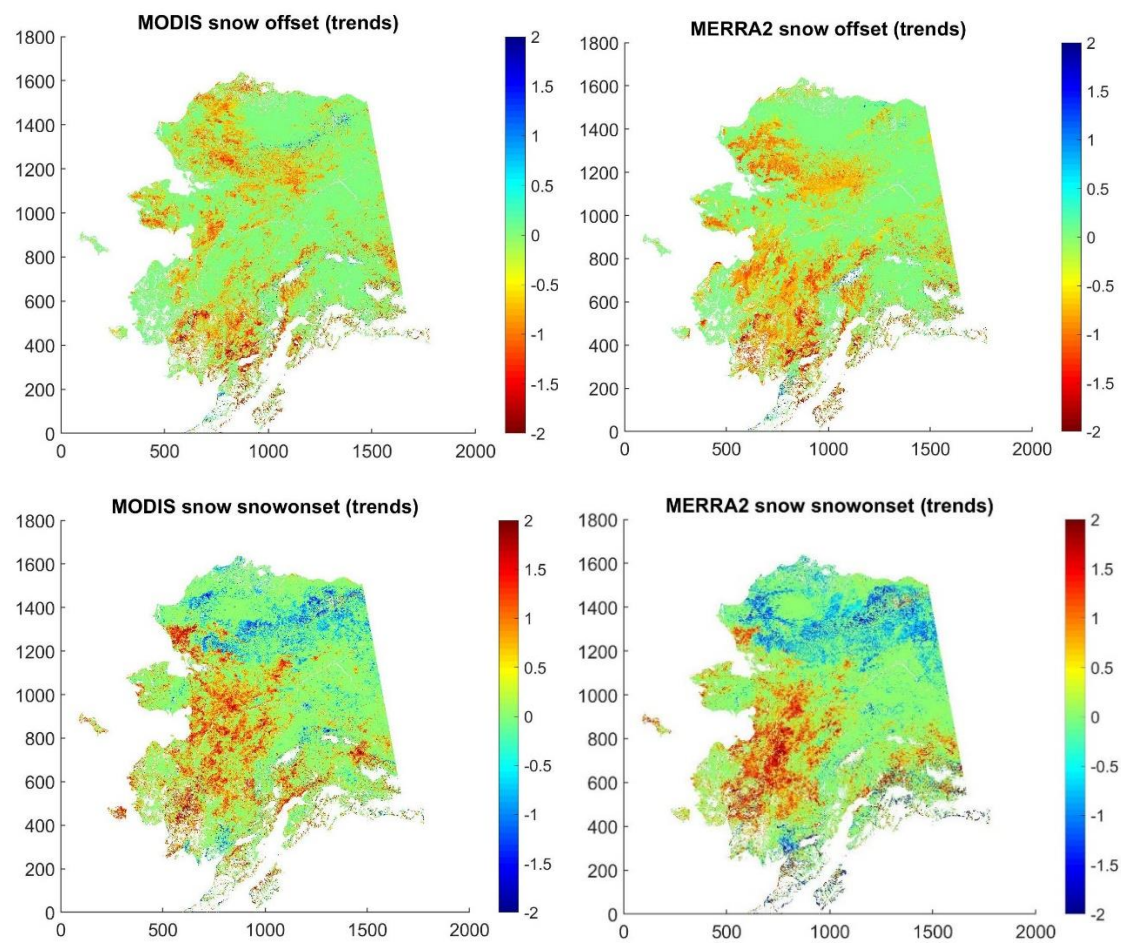

**Figure S6: Comparisons of the trends of snow offset and onset derived from MODIS SCE and downscaled MERRA-2 snow depth data averaged from 2001 to 2016.**

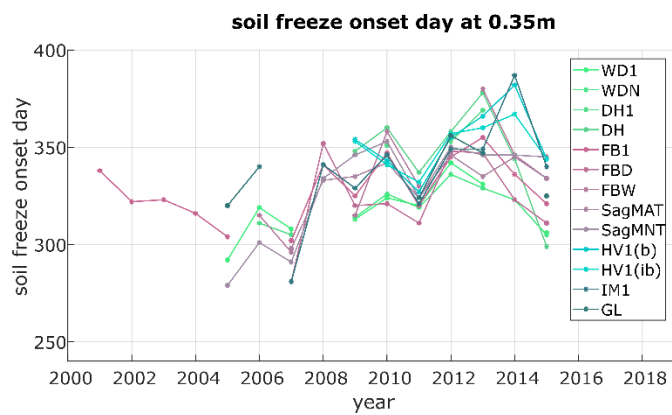

**Figure S7: The time series of soil freeze onset at depth of 0.35 m derived from soil temperature measurements at GTN-P sites along the DHN transect.**

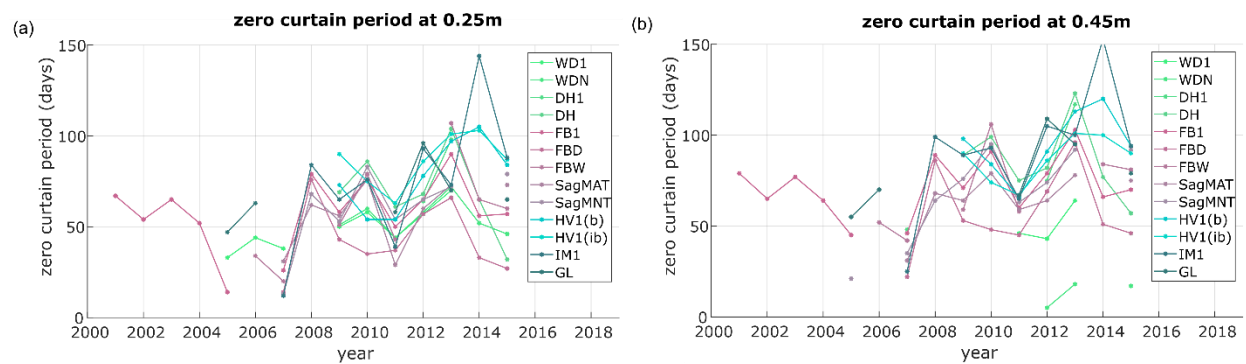

**Figure S8: The time series of zero-curtain period at depths of 0.25 m (a) and 0.45 m (b) derived from soil temperature measurements at GTN-P sites along the DHN transect.**

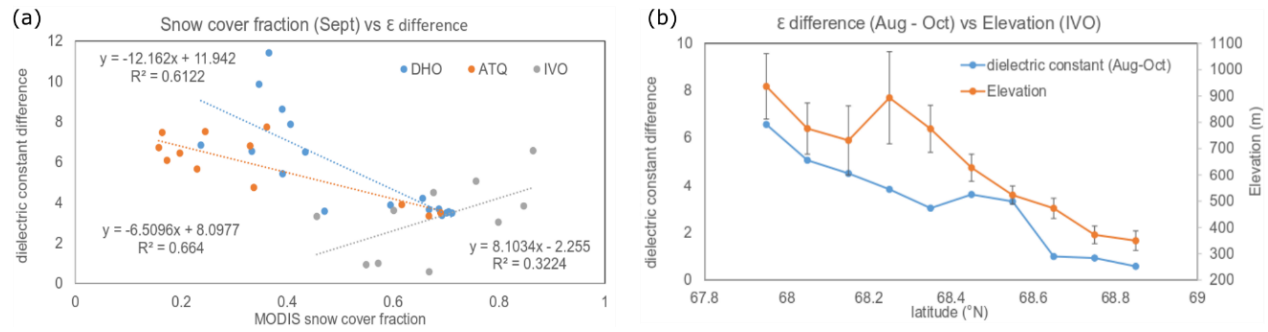

**Figure S9: (a) Variations of changes in radar retrieved dielectric constant ( $\epsilon_1$ ) of surface soils between August and early October (August – October) with MODIS SCE in September across 3 radar flights in Arctic Alaska in 2015; b) the latitudinal variations of changes in radar  $\epsilon_1$  and elevation at the Ivoituk (IVO) radar flight.**

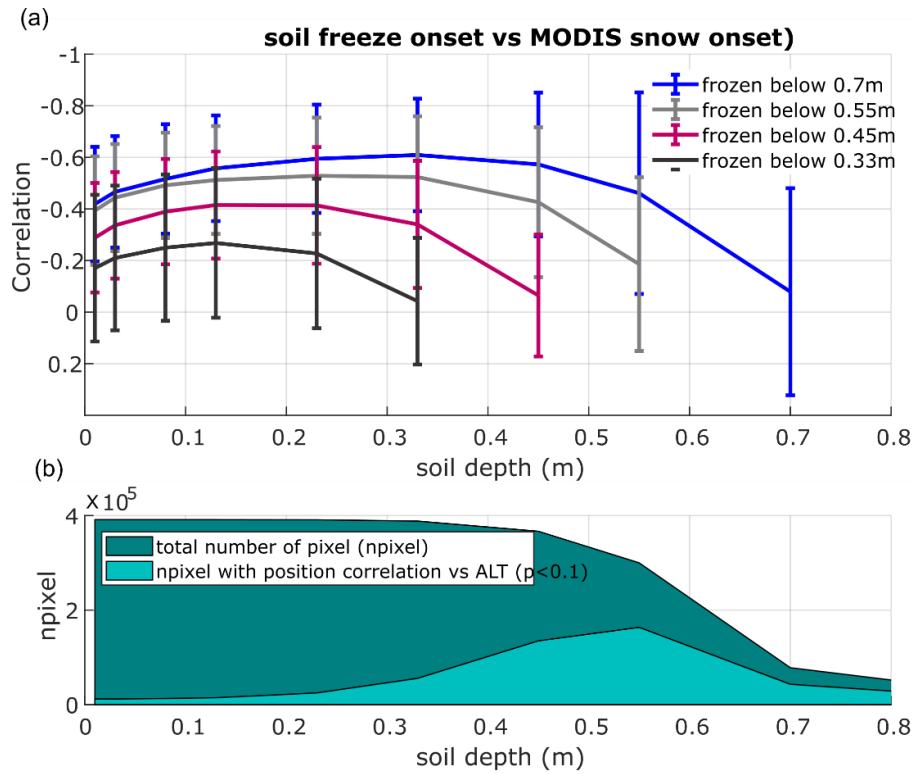

**Figure S10: Sensitivity of model simulated soil freeze onset at different depths to MODIS snow onset and model simulated ALT: a) changes in correlations between snow onset and soil freeze onset with depths. The study area was divided into 4 groups: soil column froze below 0.33 m, 0.45 m, 0.55 m, and 0.7 m. The soil column of the majority of the study area froze below 0.7m. b) the proportion of pixels with significant positive correlation between soil freeze onset and ALT at different depths. The total number of unfrozen pixel was shown as “npixel”. The correlations in both (a) and (b) were calculated for the period from 2001 to 2016.**
